# Supplementary figures and images for: Evolutionary and ontogenetic changes in RNA editing in human, chimpanzee, and macaque brains
Source: PubMed Central journal article supplement — RNA. 2013 Dec;19(12):1693–702. doi: 10.1261/rna.039206.113 (PMC3884655; doi:10.1261/rna.039206.113), 2013-12

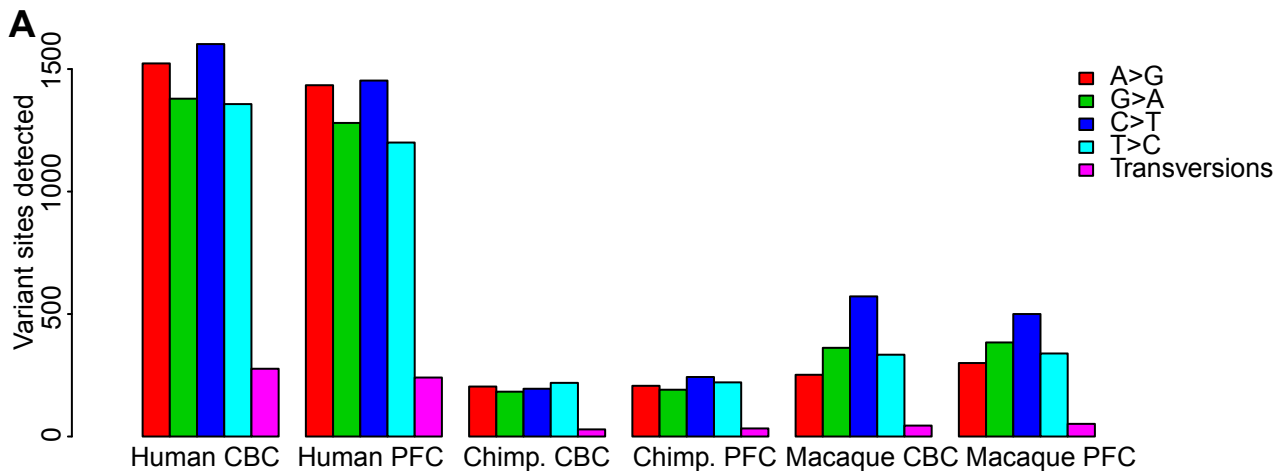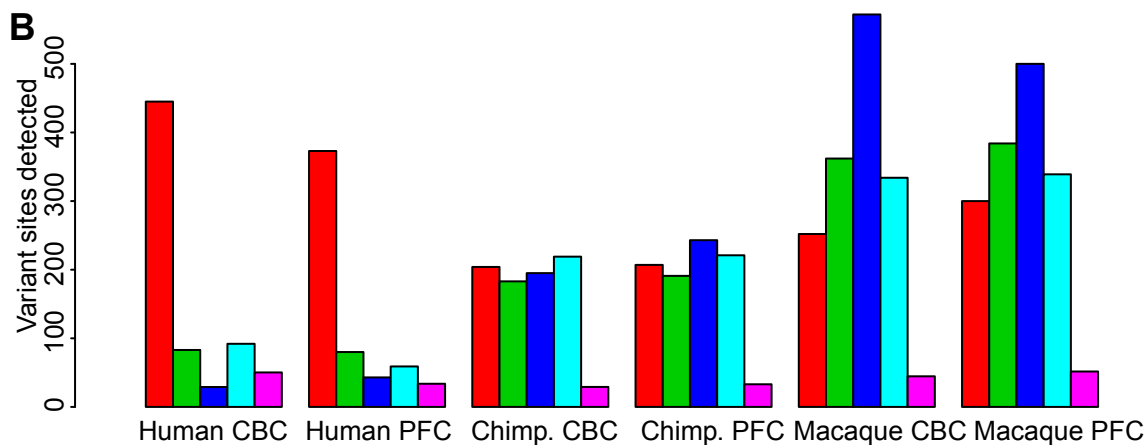

Supplement: supp_039206.113_S1_de_novo_detection.pdf [file supp_039206.113_S1_de_novo_detection.pdf]

Substitution Frequency (log10)

-2.5 -2.0 -1.5 -1.0

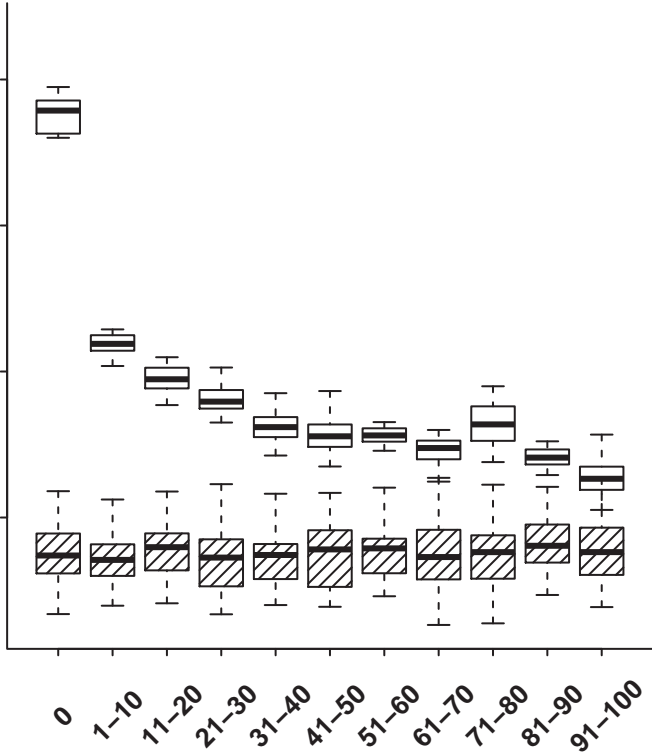

Supplement: supp_039206.113_S2_mm_dist.pdf [file supp_039206.113_S2_mm_dist.pdf]

- 3' UTR (Alu): 90.4%
- 3' UTR: 7%
- NS: 1.7%
- 5' UTR: 0.5%
- S: 0.4%

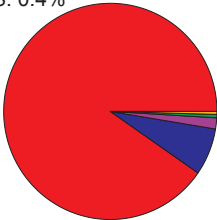

Supplement: supp_039206.113_S3_sites_reg_distr.pdf [file supp_039206.113_S3_sites_reg_distr.pdf]

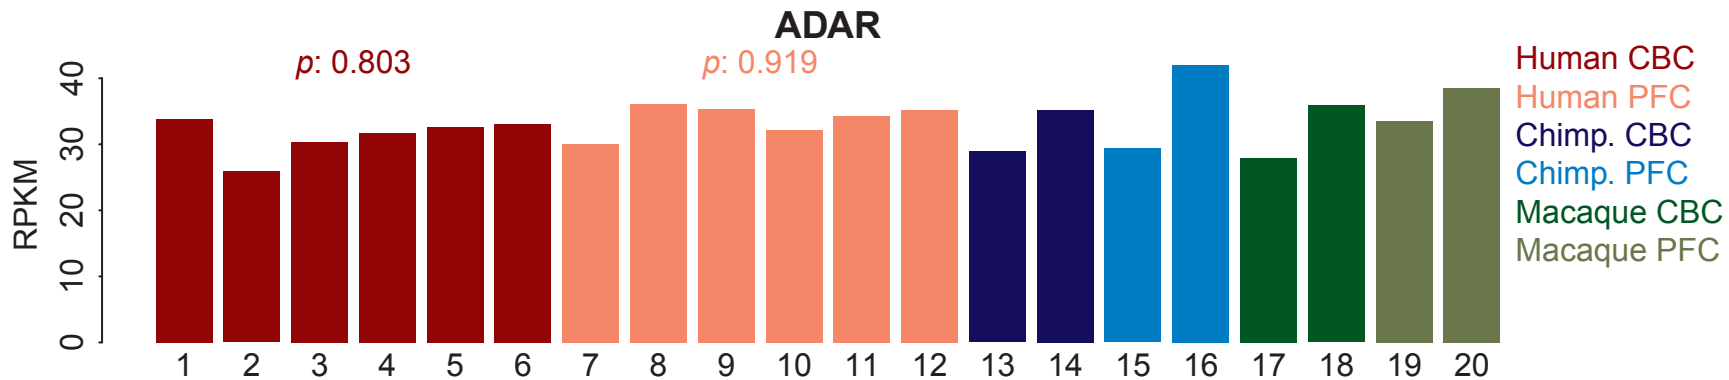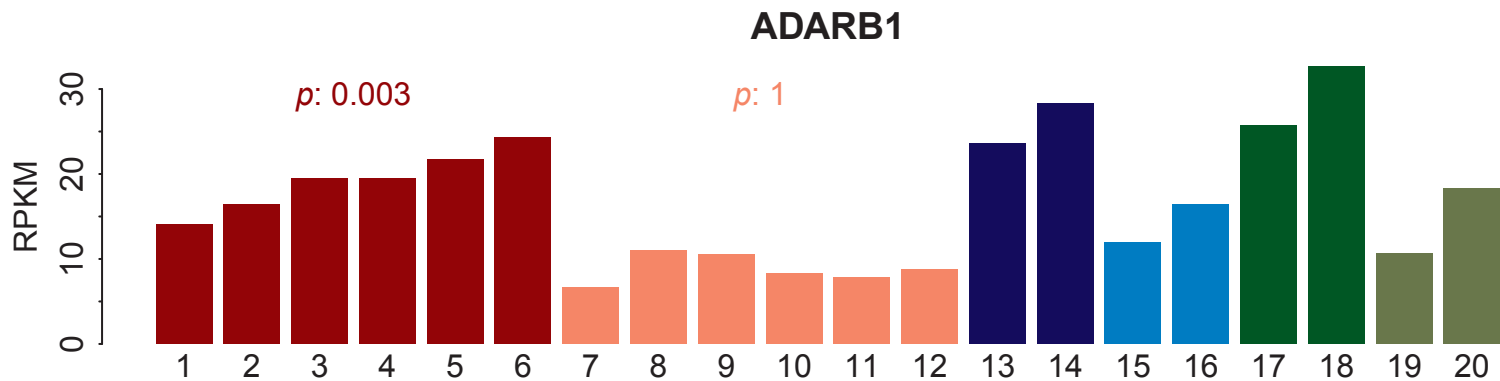

Supplement: supp_039206.113_S4_adar_expr4.pdf [file supp_039206.113_S4_adar_expr4.pdf]

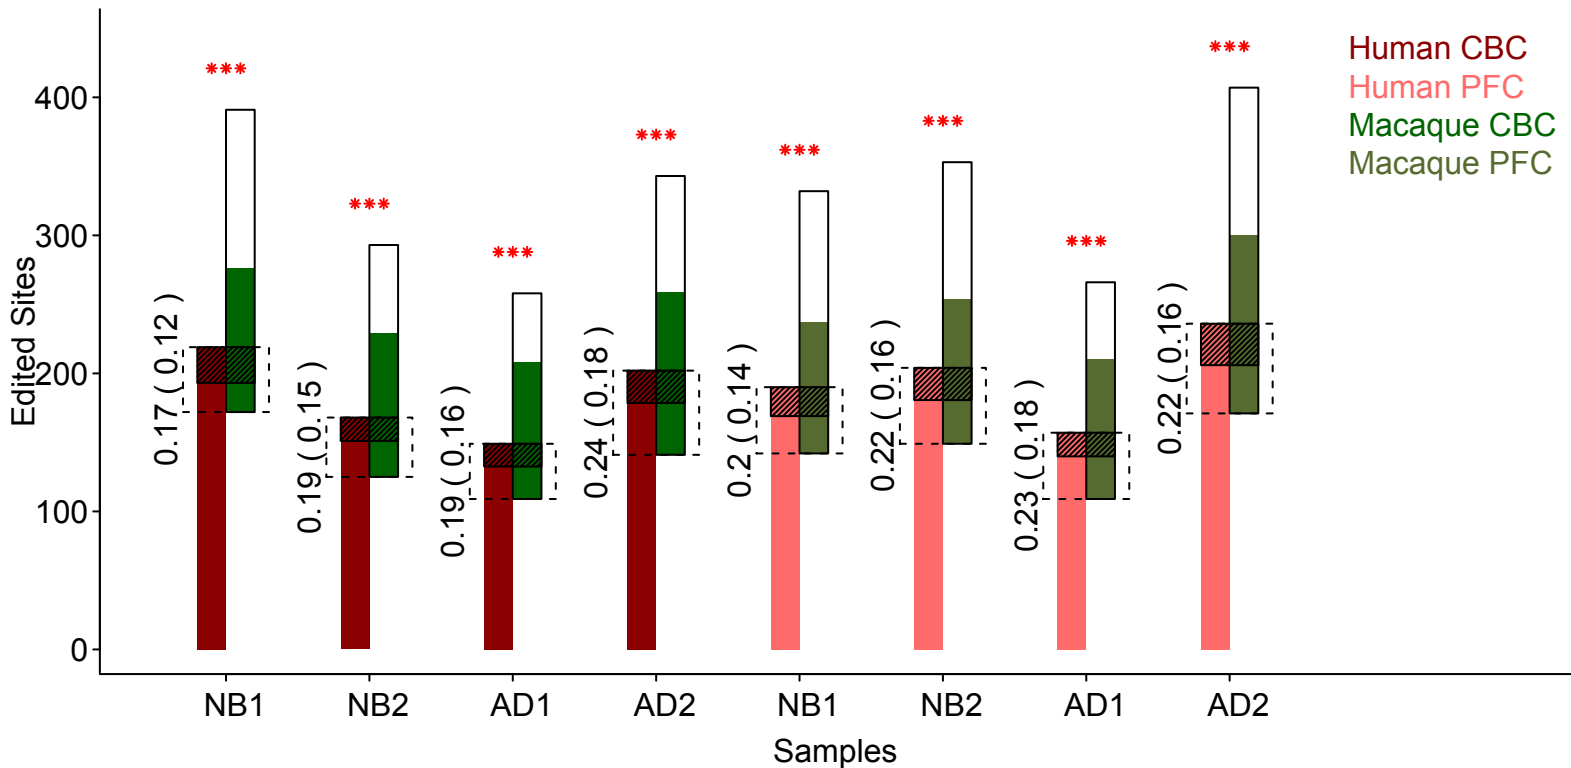

Supplement: supp_039206.113_S5_between_sp_overlap_hu_maca.pdf [file supp_039206.113_S5_between_sp_overlap_hu_maca.pdf]

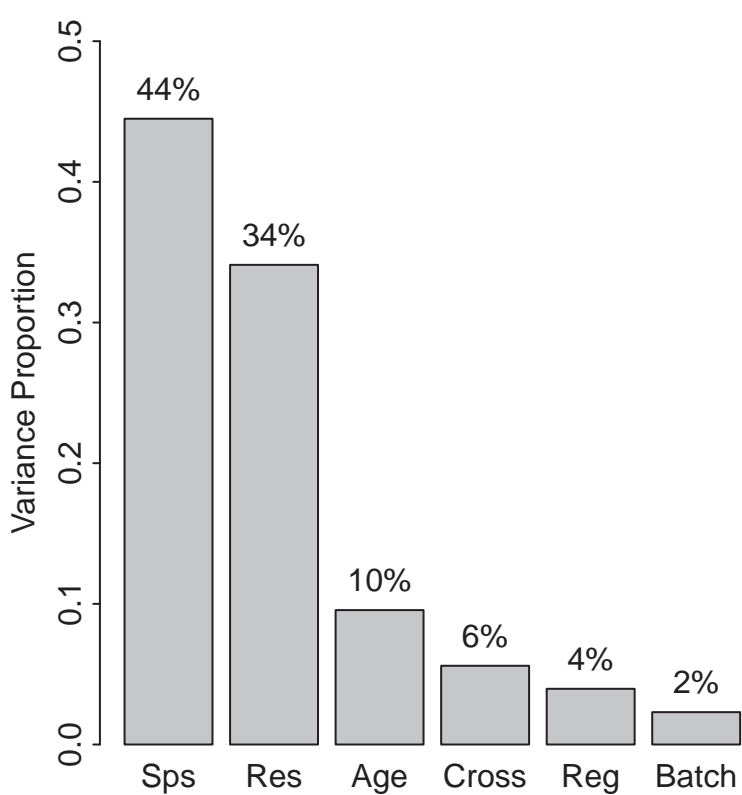

Supplement: supp_039206.113_S6_pvca_edlev.pdf [file supp_039206.113_S6_pvca_edlev.pdf]

**A**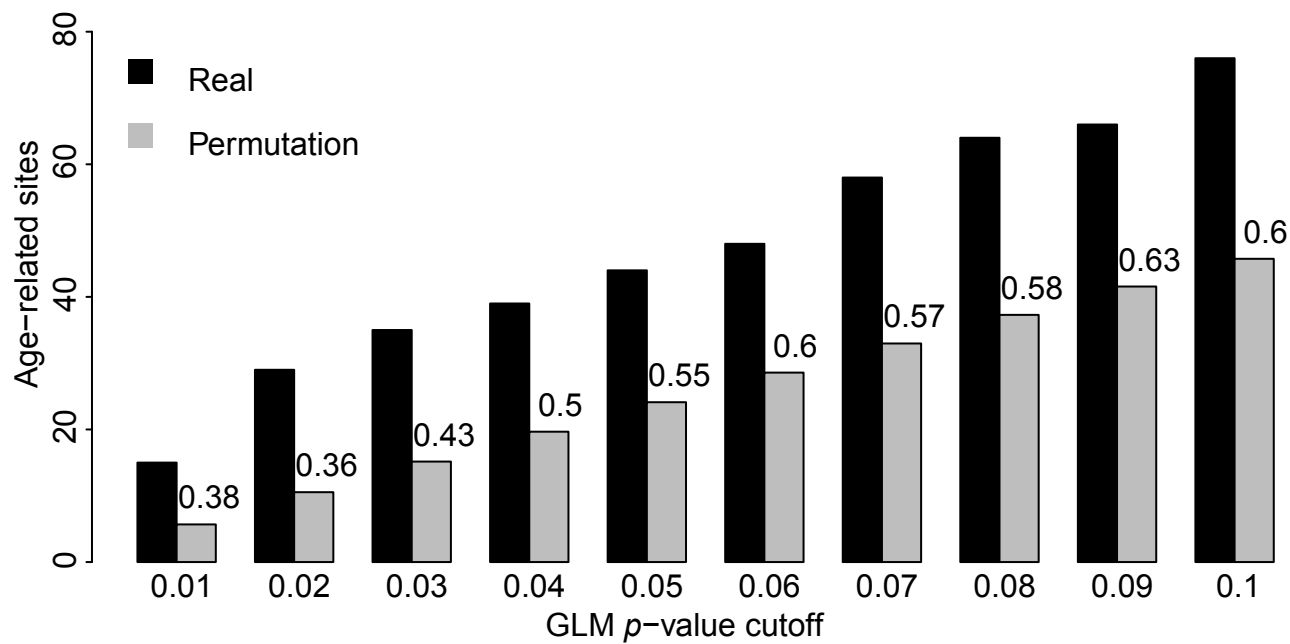**B**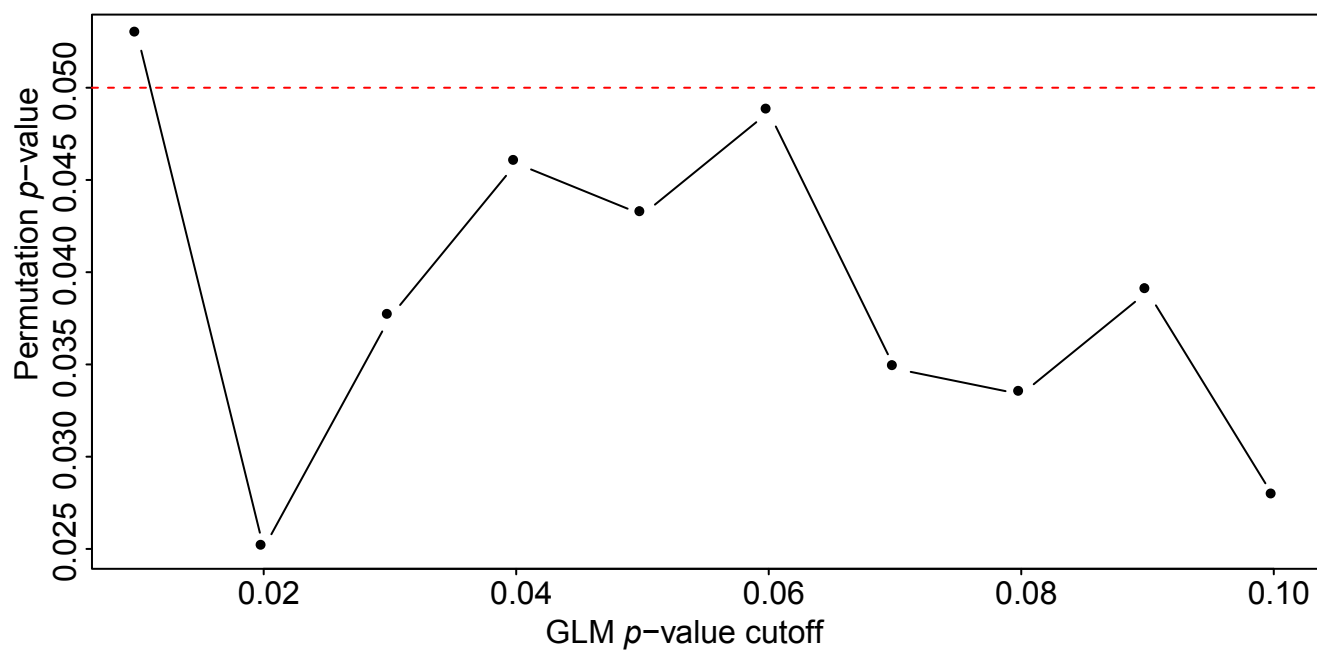**C**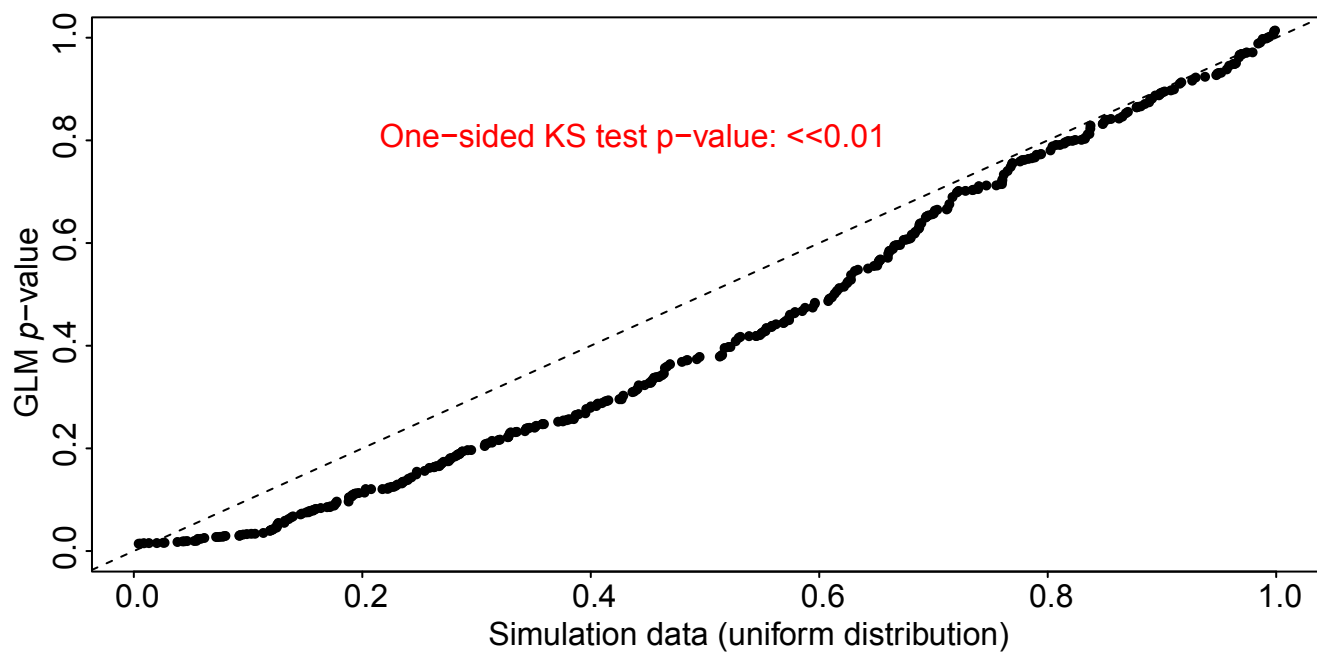

Supplement: supp_039206.113_S7_fdr_qvalue_test_p.pdf [file supp_039206.113_S7_fdr_qvalue_test_p.pdf]

A-to-G Substitution Frequency

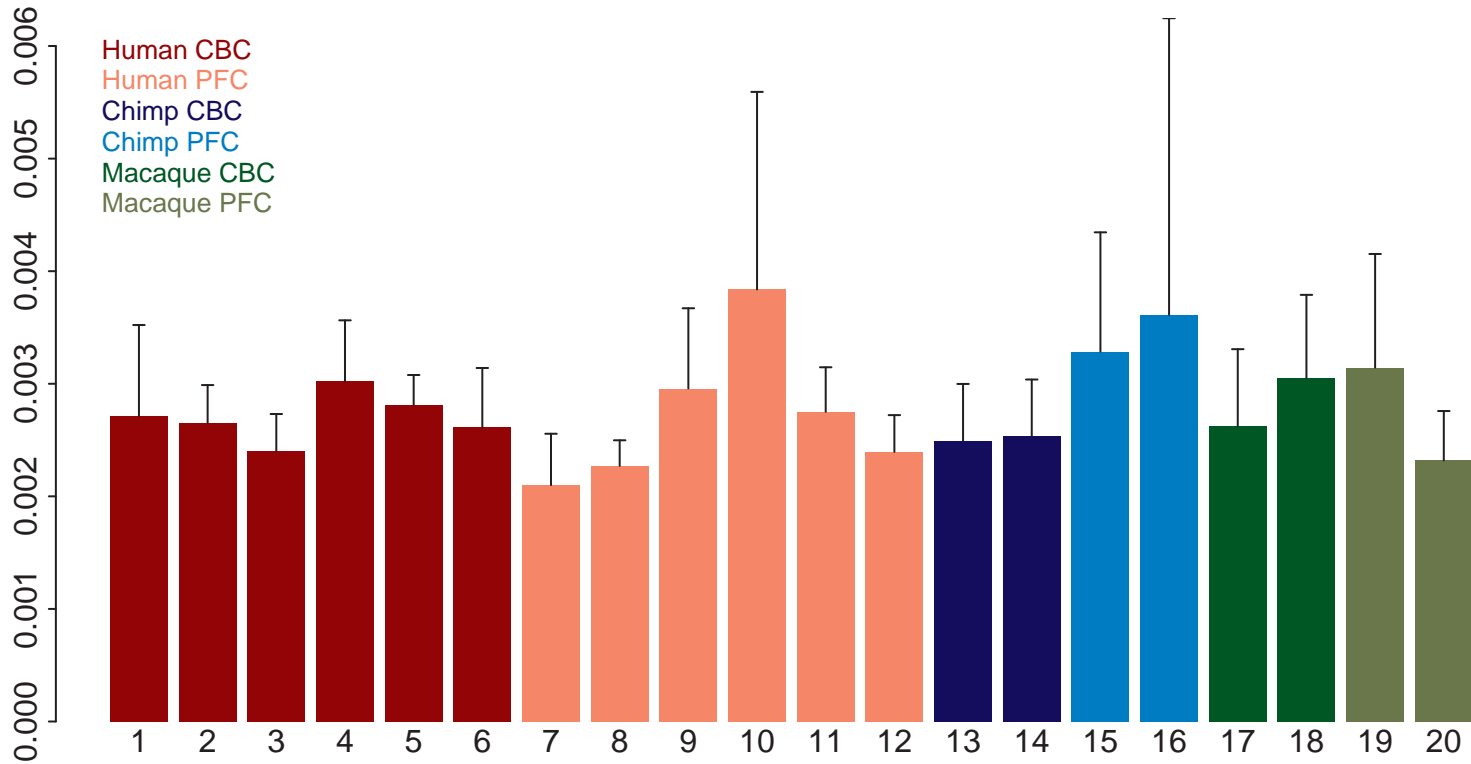

Supplement: supp_039206.113_S8_mm_age1.pdf [file supp_039206.113_S8_mm_age1.pdf]

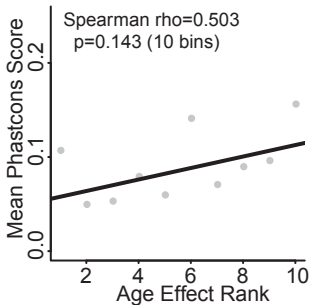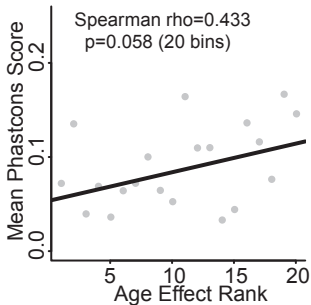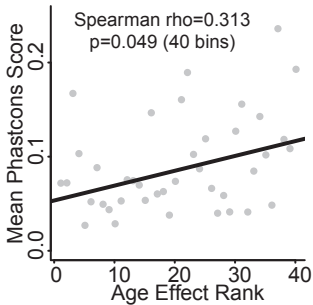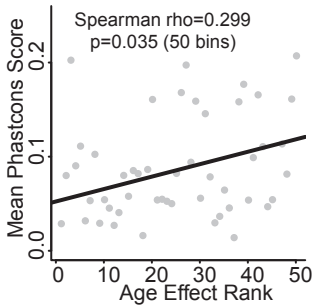

Supplement: supp_039206.113_S9_cons_vs_diff1.pdf [file supp_039206.113_S9_cons_vs_diff1.pdf]
